# Supplementary material for: A simple and low-cost method for the preparation of self-supported TiO2–WO3 ceramic heterojunction wafers
Source: Royal Society of Chemistry journal article supplement (doi:10.1039/c4ta03257h), 2014-01-01
Supplement: c4ta03257h1.pdf [file c4ta03257h1.pdf]

## Supplementary Information

### **A simple and low-cost method for the preparation of self-supported TiO<sub>2</sub>:WO<sub>3</sub> ceramic heterojunction wafers**

**Neel M. Makwana<sup>a</sup>, Raul Quesada-Cabrera<sup>a</sup>, Ivan P. Parkin<sup>a</sup>, Paul F. McMillan<sup>a</sup>,  
Andrew Mills<sup>b</sup> and Jawwad A. Darr<sup>\*a</sup>**

<sup>a</sup> Christopher Ingold Laboratories, Department of Chemistry, University College London, 20 Gordon Street, London, WC1H 0AJ, United Kingdom

<sup>b</sup> School of Chemistry and Chemical Engineering, Queen's University Belfast, Stranmillis Road, Belfast, BT9 5AG, United Kingdom

\*Corresponding author email: [j.a.darr@ucl.ac.uk](mailto:j.a.darr@ucl.ac.uk)

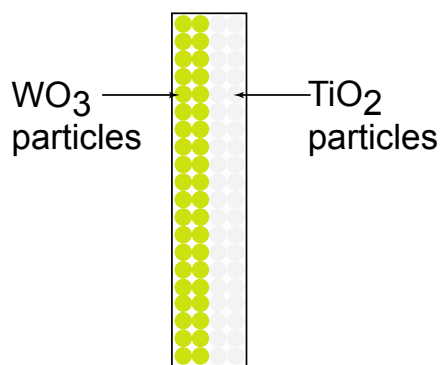

Illustration depicting the preparation of layered  $\text{TiO}_2\text{-WO}_3$  ceramic wafers

**Fig. S1**

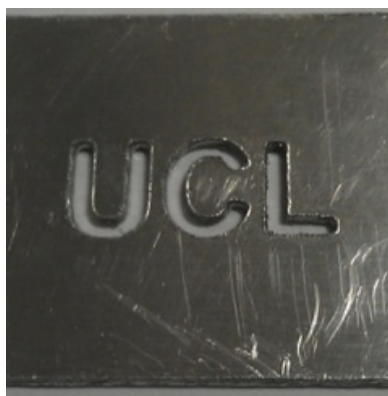

Photograph of the CNC-milled aluminum 'UCL' lettering cut-out template.

**Fig. S2**

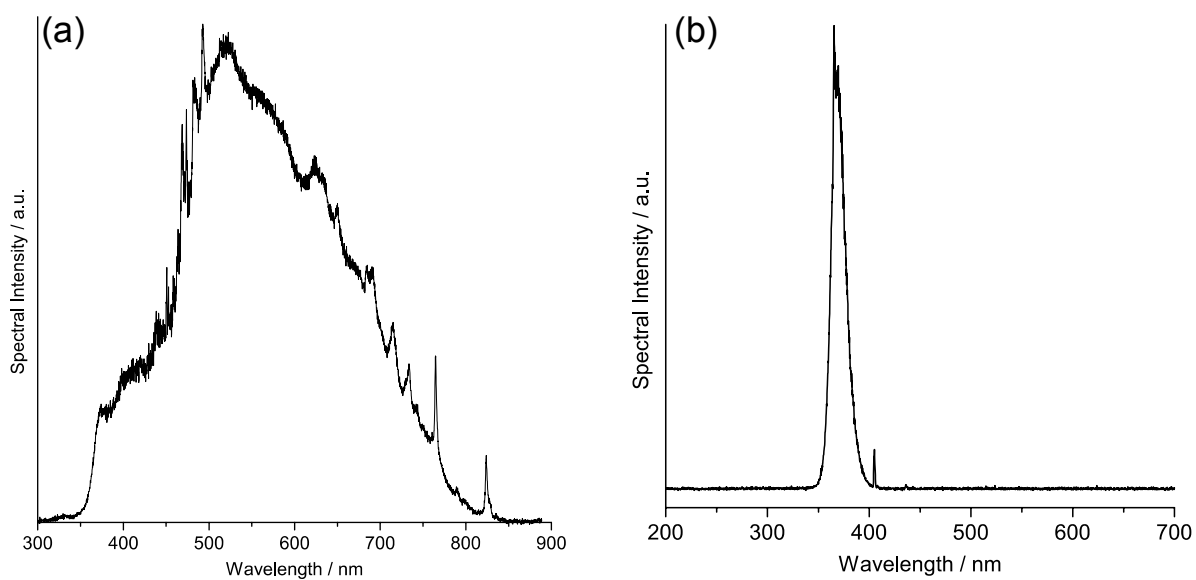

Spectral output of (a) 75 W Xe lamp and (b)  $2 \times 8\text{W}$  365 nm lamp.

**Fig. S3**

We attempted to use Raman spectroscopy to evaluate the degradation of stearic acid. Stearic acid was dropped onto the TiO<sub>2</sub> or WO<sub>3</sub> surface of the TiO<sub>2</sub>:WO<sub>3</sub> SPH and Raman spectra (514.5 nm laser) were taken every 10 minutes of the surface containing stearic acid. Although significant degradation was observed (there was a rapid decrease in integrated peak areas from peaks contributed to by stearic acid over 2 hours of the experiment), we were concerned that the Raman laser may have potentially contributed to the degradation of stearic acid, especially on the WO<sub>3</sub> surface (Fig. S5 shows the Raman spectra obtained), and for this reason we did not continue to use this technique and instead monitored the degradation by CO<sub>2</sub> evolution, as described in the main text.

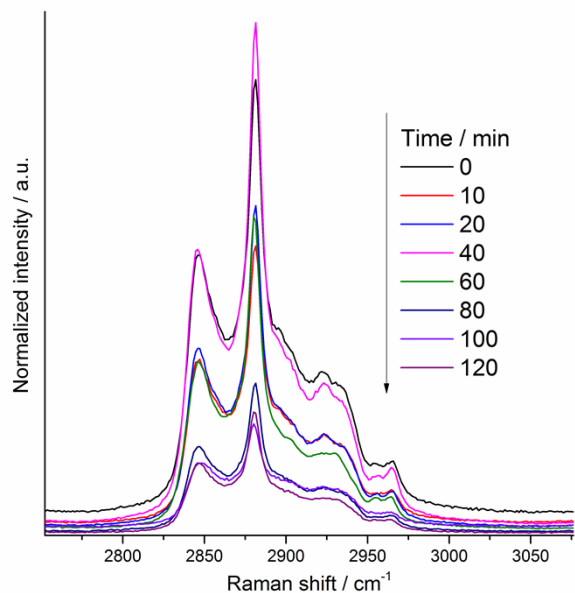

Raman spectra obtained during stearic acid degradation experiment.

**Fig. S4**

## References

1. S. Elouali, A. Mills, I. P. Parkin, E. Bailey, P. F. McMillan and J. A. Darr, *J. Photochem. Photobiol., A*, 2010, **216**, 110-114.
